# Supplementary material
Source: publisher figshare collection journal article supplement (https://karger.figshare.com/ndownloader/files/38249634)
Supplement: Supplementary file 1 [file 38249634]

**Supplement Table 3:** **Adverse drug reaction by system organ class and preferred term in the FAS**

| SOC |  | SPP-003 (N = 35) | |  | Placebo (N = 39) | |
| --- | --- | --- | --- | --- | --- | --- |
| PT |  | n (%) | # |  | n (%) | # |
| Number of subjects with at least one TEAE |  | 15 (42.9) | 32 |  | 8 (20.5) | 12 |
| Metabolism and nutrition disorders |  | 2 (5.7) | 2 |  | 0 |  |
| Decreased appetite |  | 2 (5.7) | 2 |  | 0 |  |
| Psychiatric disorders |  | 0 |  |  | 1 (2.6) | 1 |
| Insomnia |  | 0 |  |  | 1 (2.6) | 1 |
| Nervous system disorders |  | 2 (5.7) | 3 |  | 0 |  |
| Dizziness |  | 1 (2.9) | 1 |  | 0 |  |
| Headache |  | 1 (2.9) | 1 |  | 0 |  |
| Taste disorder |  | 1 (2.9) | 1 |  | 0 |  |
| Ear and labyrinth disorders |  | 1 (2.9) | 1 |  | 0 |  |
| Tinnitus |  | 1 (2.9) | 1 |  | 0 |  |
| Cardiac disorders |  | 1 (2.9) | 1 |  | 0 |  |
| Sinus tachycardia |  | 1 (2.9) | 1 |  | 0 |  |
| Vascular disorders |  | 1 (2.9) | 1 |  | 0 |  |
| Hypertension |  | 1 (2.9) | 1 |  | 0 |  |
| Gastrointestinal disorders |  | 9 (25.7) | 14 |  | 3 (7.7) | 3 |
| Feces discolored |  | 4 (11.4) | 4 |  | 0 |  |
| Nausea |  | 3 (8.6) | 4 |  | 1 (2.6) | 1 |
| Abdominal pain upper |  | 2 (5.7) | 3 |  | 0 |  |
| Abdominal discomfort |  | 1 (2.9) | 1 |  | 1 (2.6) | 1 |
| Constipation |  | 1 (2.9) | 1 |  | 0 |  |
| Vomiting |  | 1 (2.9) | 1 |  | 0 |  |
| Gastritis |  | 0 |  |  | 1 (2.6) | 1 |
| Investigations |  | 8 (22.9) | 10 |  | 5 (12.8) | 8 |
| Serum ferritin increased |  | 8 (22.9) | 10 |  | 5 (12.8) | 5 |
| Beta 2 microglobulin increased |  | 0 |  |  | 1 (2.6) | 1 |
| Beta-N-acetyl-D-glucosaminidase increased |  | 0 |  |  | 1 (2.6) | 1 |
| Urine output increased |  | 0 |  |  | 1 (2.6) | 1 |

Adverse drug reactions were collected on or after the date/time of the first dose of the study treatment and on or before 21 days after the date/time of the last dose of the study treatment.

MedDRA v.23.0
